# Supplementary material
Source: Research Square preprint supplement (doi:10.21203/rs.3.rs-9377968/v1)
Supplement: Supplementary file 1 [file 26ff290ce08bf25cceeeb9d8.docx]

**A Dual-Target Fluorescent Chemosensor Based on Naphthalene Oxa-Aza receptor for Zn²⁺ and Tyrosine Detection**

Elham Koolivanda, Reza Azadbakhta,[[1]](#footnote-1)* and Hassan Keypoura

*aDepartment of Inorganic Chemistry, Faculty of Chemistry and Petroleum Sciences., Bu-Ali Sina University, Hamedan, Iran*


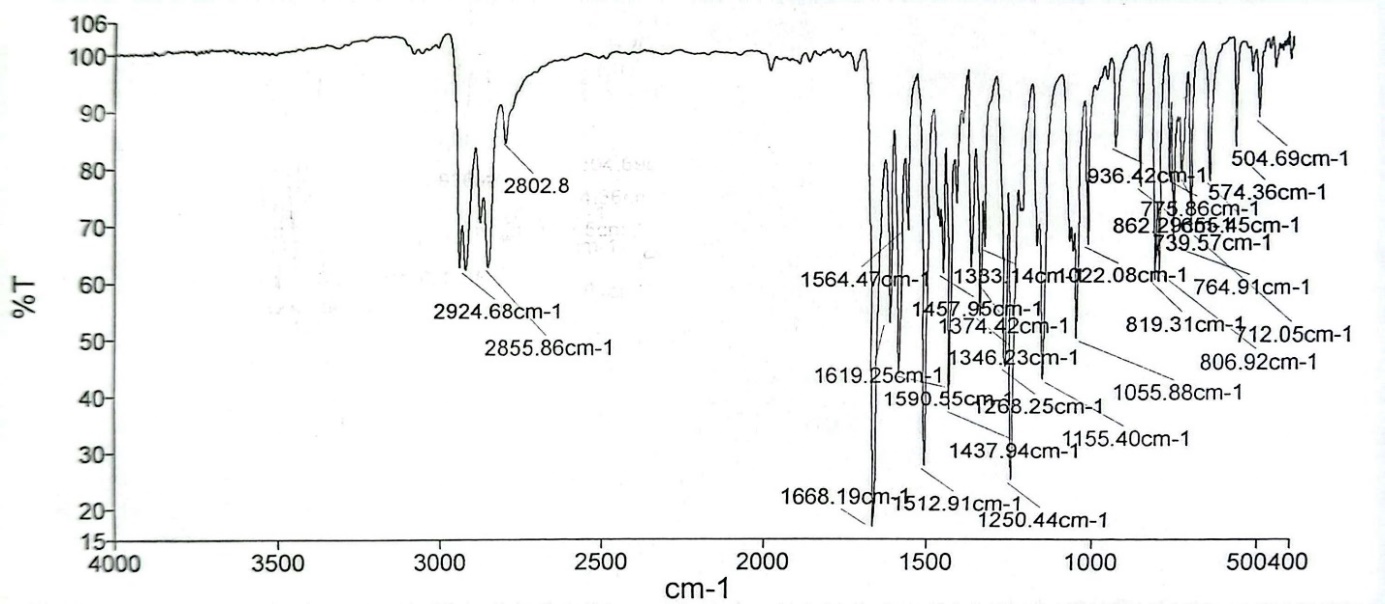


**Fig. S1.** IR spectra of the dialdehyde (A)

**
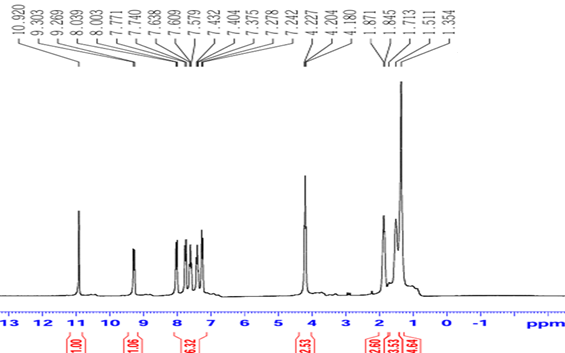
Fig. S2**. 1HNMR spectrum of dialdehyde (D) in CDCl3.


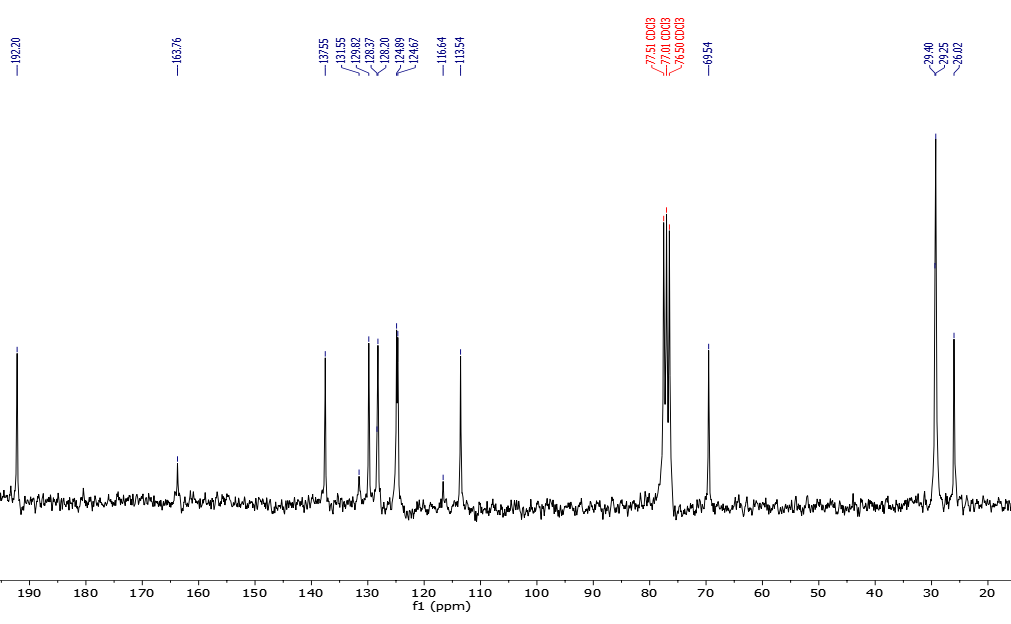


**Fig. S3**.13CNMR spectrum of the dialdehyde (D) in CDCl3.

**Fig. S4.** DEPT spectrum of the dialdehyde (D) in CDCl3


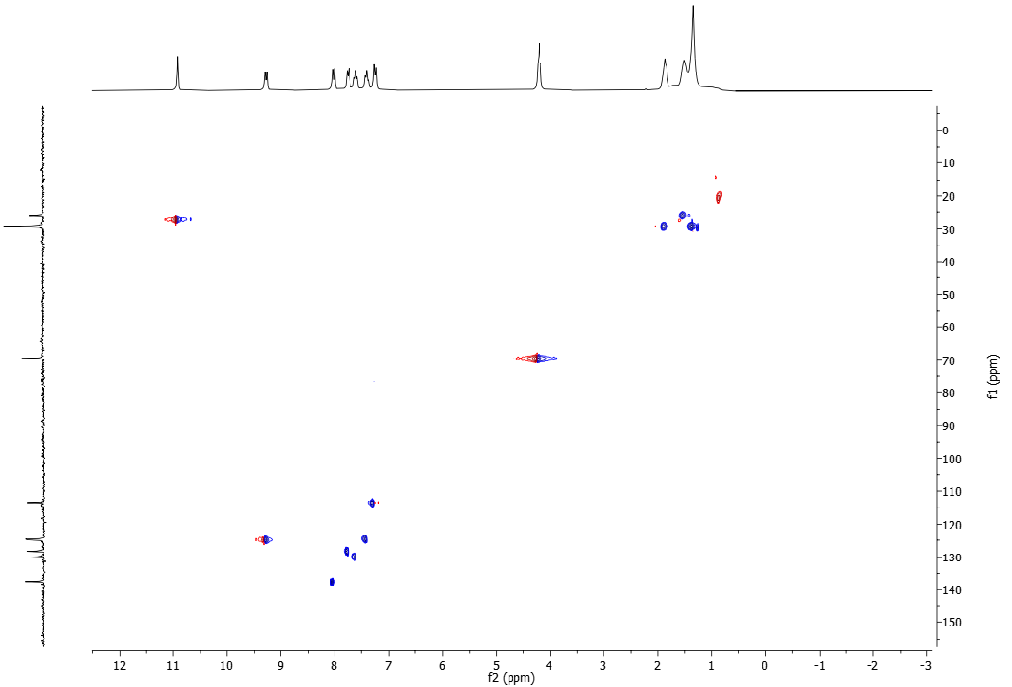


**Fig. S5.** HSQC spectrum of the dialdehyde (D) in CDCl3


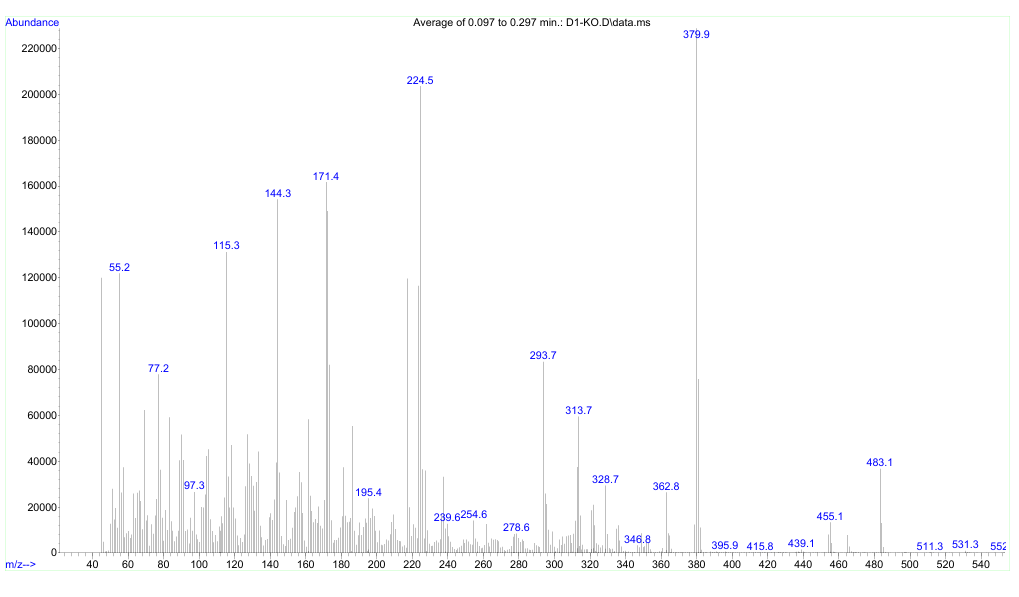


**Fig.S6**. Mass spectrum of L


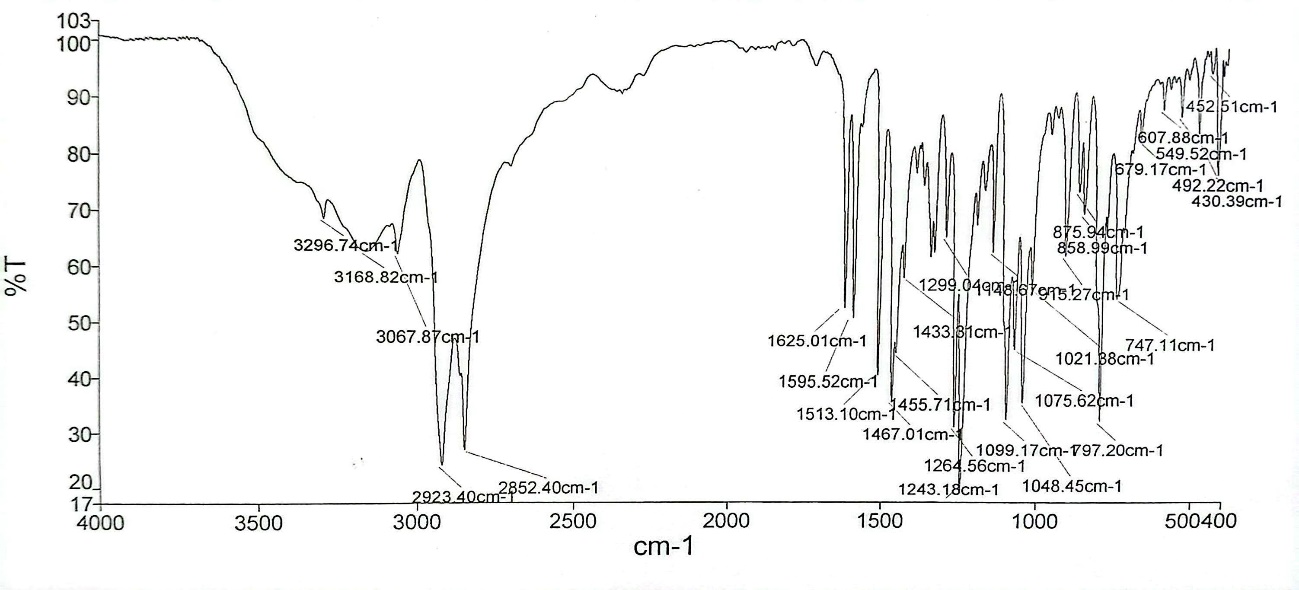


**Fig. S7.** IR spectra of L.


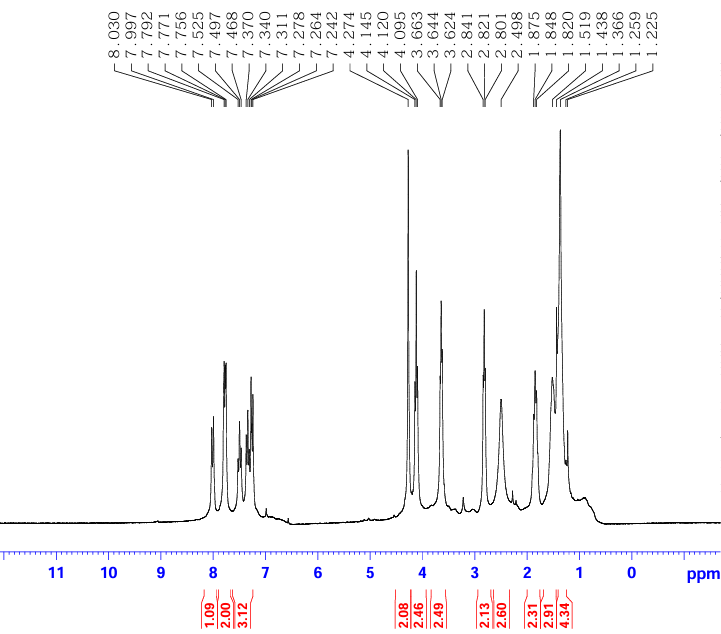
**Fig. S8**. 1HNMR spectrum of L in CDCl3.


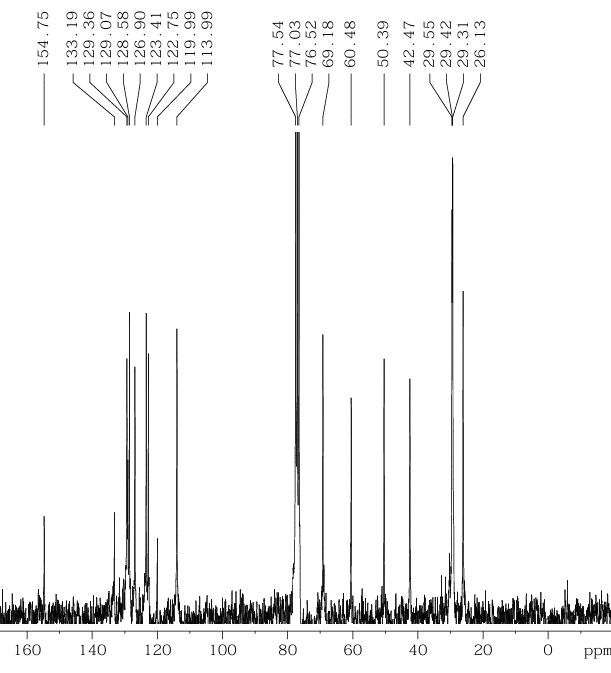


**Fig. S9**.13CNMR spectrum of L in CDCl3.

**Fig. S10.** DEPT spectrum of L in CDCl3.

**Fig. S11.** HSQC spectrum of L in CDCl3


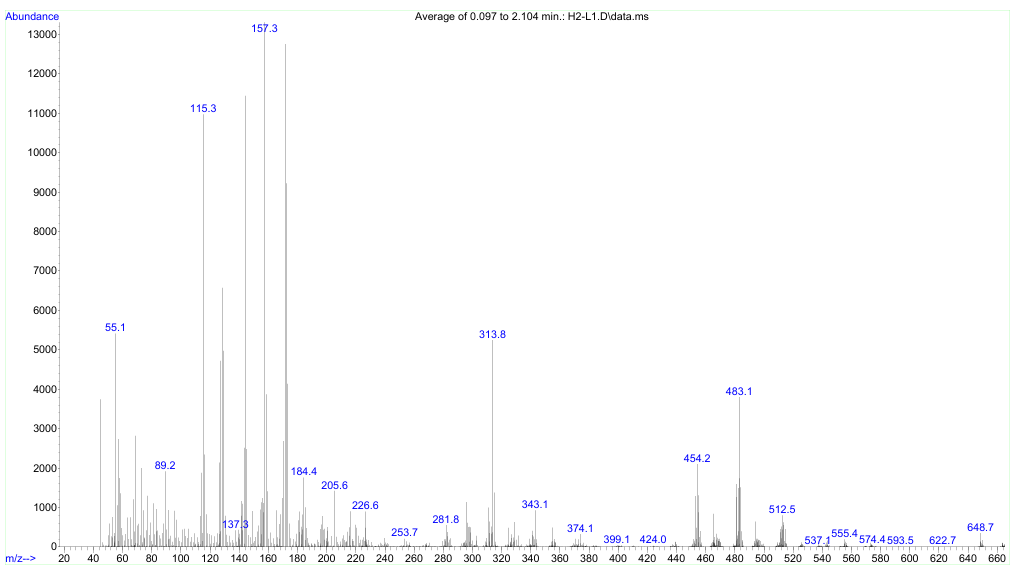


**Fig.S12**. Mass spectrum of L


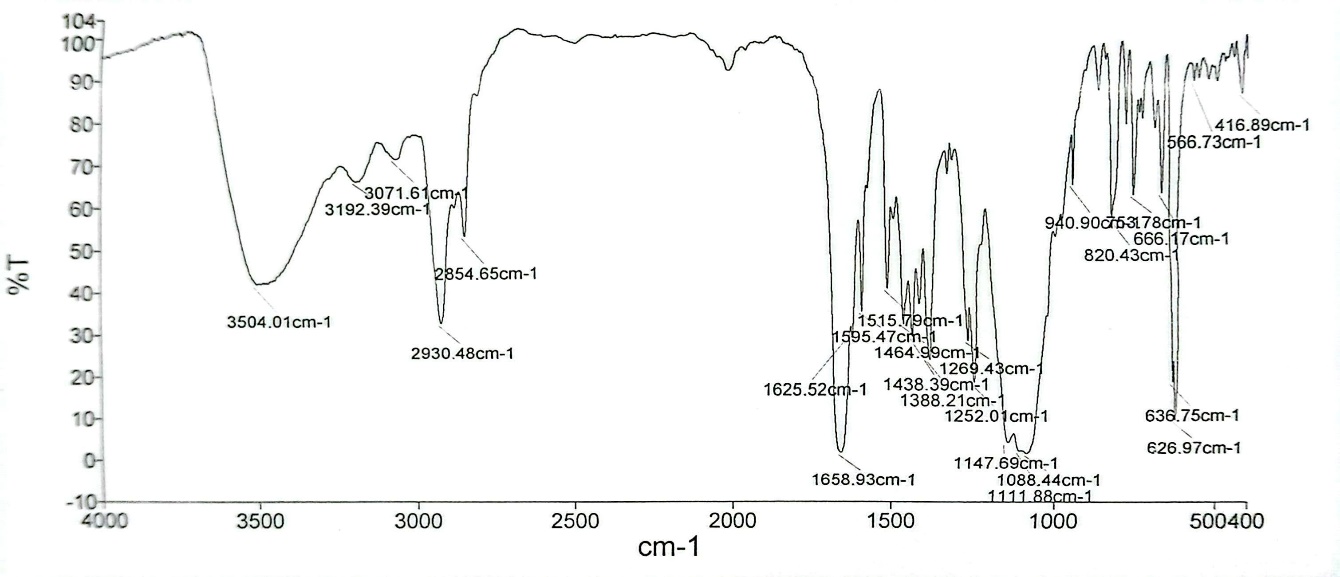


**Fig. S13.** IR spectra of [ZnL] complex

**Fig. S14.** UV-vis absorption spectra of chemosensor L alone and in the presence of Zn²⁺ ions.

1. *Corresponding author. Tel.: +98 8138282807; Fax: +98 8138381602.

   E-mail address: r.azadbakht@basu.ac.ir (R. Azadbakht) [↑](#footnote-ref-1)
